# Supplementary material for: A topologically chiral catenane that is not topologically chiral
Source: Research Square preprint supplement (doi:10.21203/rs.3.rs-2072758/v1), 2022-10-20

## checkCIF/PLATON report

Structure factors have been supplied for datablock(s) SE\_S36

THIS REPORT IS FOR GUIDANCE ONLY. IF USED AS PART OF A REVIEW PROCEDURE FOR PUBLICATION, IT SHOULD NOT REPLACE THE EXPERTISE OF AN EXPERIENCED CRYSTALLOGRAPHIC REFEREE.

No syntax errors found.      CIF dictionary      Interpreting this report

### Datablock: SE\_S36

---

Bond precision:      C-C = 0.0037 Å      Wavelength=1.54178

Cell:                      a=23.4801 (3)                      b=23.6834 (2)                      c=24.6001 (3)  
                             alpha=75.386 (1)                      beta=70.306 (1)                      gamma=67.900 (1)  
Temperature:              100 K

|                        | Calculated                                                         | Reported                                                            |
|------------------------|--------------------------------------------------------------------|---------------------------------------------------------------------|
| Volume                 | 11809.2 (3)                                                        | 11809.2 (3)                                                         |
| Space group            | P -1                                                               | P -1                                                                |
| Hall group             | -P 1                                                               | -P 1                                                                |
| Moiety formula         | 2 (C40 H52 N6 O), C40 H50 N6, 3 (C40 H43 N3 O3), 2 (C6 H14) [+ sol | 3 (C40 H43 N3 O3), 2 (C40 H52 N6 O), C40 H50 N6, 2 (C6 H14), 2 [C6H |
| Sum formula            | C252 H311 N27 O11 [+ solvent]                                      | C264 H339 N27 O11                                                   |
| Mr                     | 3894.28                                                            | 4066.60                                                             |
| Dx, g cm <sup>-3</sup> | 1.095                                                              | 1.144                                                               |
| Z                      | 2                                                                  | 2                                                                   |
| Mu (mm <sup>-1</sup> ) | 0.523                                                              | 0.541                                                               |
| F000                   | 4200.0                                                             | 4400.0                                                              |
| F000'                  | 4211.15                                                            |                                                                     |
| h, k, lmax             | 29, 29, 31                                                         | 29, 28, 30                                                          |
| Nref                   | 49956                                                              | 46453                                                               |
| Tmin, Tmax             | 0.878, 0.922                                                       | 0.866, 1.000                                                        |
| Tmin'                  | 0.873                                                              |                                                                     |

Correction method= # Reported T Limits: Tmin=0.866 Tmax=1.000  
AbsCorr = MULTII-SCAN

Data completeness= 0.930

Theta (max)= 77.035

R(reflections)= 0.0617( 38127)

wR2(reflections)=  
0.1787( 46453)

S = 1.015

Npar= 2727

---

The following ALERTS were generated. Each ALERT has the format

**test-name\_ALERT\_alert-type\_alert-level.**

Click on the hyperlinks for more details of the test.

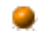

### Alert level B

PLAT097\_ALERT\_2\_B Large Reported Max. (Positive) Residual Density 0.87 eA-3

**Author Response: Arises from unmodelled minor disorder of macrocycle linker.**

PLAT417\_ALERT\_2\_B Short Inter D-H..H-D H00N ..H00S . 1.96 Ang.  
x,y,z = 1\_555 Check

**Author Response: Arises from intra- and inter-molecular H-bonded hydroxy groups of a single rotaxane of the structure which are geometrically close.**

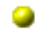

### Alert level C

DIFMN02\_ALERT\_2\_C The minimum difference density is < -0.1\*ZMAX\*0.75  
\_refine\_diff\_density\_min given = -0.638  
Test value = -0.600

DIFMN03\_ALERT\_1\_C The minimum difference density is < -0.1\*ZMAX\*0.75  
The relevant atom site should be identified.

DIFMX02\_ALERT\_1\_C The maximum difference density is > 0.1\*ZMAX\*0.75  
The relevant atom site should be identified.

PLAT098\_ALERT\_2\_C Large Reported Min. (Negative) Residual Density -0.64 eA-3  
PLAT220\_ALERT\_2\_C NonSolvent Resd 1 C Ueq(max)/Ueq(min) Range 4.1 Ratio  
PLAT222\_ALERT\_3\_C NonSolvent Resd 1 H Uiso(max)/Uiso(min) Range 5.0 Ratio  
PLAT241\_ALERT\_2\_C High 'MainMol' Ueq as Compared to Neighbors of C07M Check  
PLAT242\_ALERT\_2\_C Low 'MainMol' Ueq as Compared to Neighbors of C045 Check  
PLAT260\_ALERT\_2\_C Large Average Ueq of Residue Including C07X 0.174 Check  
PLAT360\_ALERT\_2\_C Short C(sp3)-C(sp3) Bond C07M - C07R 1.38 Ang.  
PLAT906\_ALERT\_3\_C Large K Value in the Analysis of Variance ..... 2.844 Check  
PLAT910\_ALERT\_3\_C Missing # of FCF Reflection(s) Below Theta(Min). 8 Note  
PLAT911\_ALERT\_3\_C Missing FCF Refl Between Thmin & STh/L= 0.600 286 Report  
PLAT934\_ALERT\_3\_C Number of (Iobs-Icalc)/Sigma(W) > 10 Outliers .. 1 Check  
PLAT976\_ALERT\_2\_C Check Calcd Resid. Dens. 0.53Ang From O013 -0.63 eA-3  
PLAT976\_ALERT\_2\_C Check Calcd Resid. Dens. 0.42Ang From O00N -0.51 eA-3

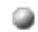

### Alert level G

FORMU01\_ALERT\_2\_G There is a discrepancy between the atom counts in the  
\_chemical\_formula\_sum and the formula from the \_atom\_site\* data.  
Atom count from \_chemical\_formula\_sum: C264 H339 N27 O11  
Atom count from the \_atom\_site data: C252 H311 N27 O11  
CELLZ01\_ALERT\_1\_G Difference between formula and atom\_site contents detected.  
CELLZ01\_ALERT\_1\_G ALERT: Large difference may be due to a

symmetry error - see SYMMG tests  
 From the CIF: \_cell\_formula\_units\_Z 2  
 From the CIF: \_chemical\_formula\_sum C264 H339 N27 O11  
 TEST: Compare cell contents of formula and atom\_site data

| atom | Z*formula | cif sites | diff  |  |
|------|-----------|-----------|-------|--|
| C    | 528.00    | 504.00    | 24.00 |  |
| H    | 678.00    | 622.00    | 56.00 |  |
| N    | 54.00     | 54.00     | 0.00  |  |
| O    | 22.00     | 22.00     | 0.00  |  |

  

|                   |                                                  |       |       |              |
|-------------------|--------------------------------------------------|-------|-------|--------------|
| PLAT002_ALERT_2_G | Number of Distance or Angle Restraints on AtSite |       | 16    | Note         |
| PLAT007_ALERT_5_G | Number of Unrefined Donor-H Atoms .....          |       | 5     | Report       |
| PLAT041_ALERT_1_G | Calc. and Reported SumFormula Strings Differ     |       |       | Please Check |
| PLAT042_ALERT_1_G | Calc. and Reported MoietyFormula Strings Differ  |       |       | Please Check |
| PLAT083_ALERT_2_G | SHELXL Second Parameter in WGHT Unusually Large  |       | 5.20  | Why ?        |
| PLAT154_ALERT_1_G | The s.u.'s on the Cell Angles are Equal ..(Note) |       | 0.001 | Degree       |
| PLAT176_ALERT_4_G | The CIF-Embedded .res File Contains SADI Records |       | 13    | Report       |
| PLAT187_ALERT_4_G | The CIF-Embedded .res File Contains RIGU Records |       | 1     | Report       |
| PLAT301_ALERT_3_G | Main Residue Disorder .....(Resd 1 )             |       | 6%    | Note         |
| PLAT302_ALERT_4_G | Anion/Solvent/Minor-Residue Disorder (Resd 2 )   |       | 9%    | Note         |
| PLAT412_ALERT_2_G | Short Intra XH3 .. XHn H034 ..H5A .              |       | 2.08  | Ang.         |
|                   | x,y,z =                                          | 1_555 | Check |              |
| PLAT412_ALERT_2_G | Short Intra XH3 .. XHn H05R ..H2A .              |       | 2.06  | Ang.         |
|                   | x,y,z =                                          | 1_555 | Check |              |
| PLAT432_ALERT_2_G | Short Inter X...Y Contact O003 ..C026 .          |       | 2.96  | Ang.         |
|                   | x,y,z =                                          | 1_555 | Check |              |
| PLAT432_ALERT_2_G | Short Inter X...Y Contact C032 ..C03D .          |       | 3.13  | Ang.         |
|                   | x,y,z =                                          | 1_555 | Check |              |
| PLAT606_ALERT_4_G | Solvent Accessible VOID(S) in Structure .....    |       | !     | Info         |
| PLAT720_ALERT_4_G | Number of Unusual/Non-Standard Labels .....      |       | 516   | Note         |
| PLAT793_ALERT_4_G | Model has Chirality at C024 (Centro SPGR)        |       | R     | Verify       |
| PLAT793_ALERT_4_G | Model has Chirality at C02H (Centro SPGR)        |       | S     | Verify       |
| PLAT793_ALERT_4_G | Model has Chirality at C03L (Centro SPGR)        |       | S     | Verify       |
| PLAT793_ALERT_4_G | Model has Chirality at C04R (Centro SPGR)        |       | R     | Verify       |
| PLAT860_ALERT_3_G | Number of Least-Squares Restraints .....         |       | 49    | Note         |
| PLAT868_ALERT_4_G | ALERTS Due to the Use of _smtbx_masks Suppressed |       | !     | Info         |
| PLAT912_ALERT_4_G | Missing # of FCF Reflections Above STh/L= 0.600  |       | 3042  | Note         |
| PLAT913_ALERT_3_G | Missing # of Very Strong Reflections in FCF .... |       | 1     | Note         |
| PLAT941_ALERT_3_G | Average HKL Measurement Multiplicity .....       |       | 4.5   | Low          |
| PLAT978_ALERT_2_G | Number C-C Bonds with Positive Residual Density. |       | 1     | Info         |

---

0 **ALERT level A** = Most likely a serious problem - resolve or explain  
 2 **ALERT level B** = A potentially serious problem, consider carefully  
 16 **ALERT level C** = Check. Ensure it is not caused by an omission or oversight  
 29 **ALERT level G** = General information/check it is not something unexpected

7 ALERT type 1 CIF construction/syntax error, inconsistent or missing data  
 19 ALERT type 2 Indicator that the structure model may be wrong or deficient  
 9 ALERT type 3 Indicator that the structure quality may be low  
 11 ALERT type 4 Improvement, methodology, query or suggestion  
 1 ALERT type 5 Informative message, check

---

It is advisable to attempt to resolve as many as possible of the alerts in all categories. Often the minor alerts point to easily fixed oversights, errors and omissions in your CIF or refinement strategy, so attention to these fine details can be worthwhile. In order to resolve some of the more serious problems it may be necessary to carry out additional measurements or structure refinements. However, the purpose of your study may justify the reported deviations and the more serious of these should normally be commented upon in the discussion or experimental section of a paper or in the "special\_details" fields of the CIF. checkCIF was carefully designed to identify outliers and unusual parameters, but every test has its limitations and alerts that are not important in a particular case may appear. Conversely, the absence of alerts does not guarantee there are no aspects of the results needing attention. It is up to the individual to critically assess their own results and, if necessary, seek expert advice.

### **Publication of your CIF in IUCr journals**

A basic structural check has been run on your CIF. These basic checks will be run on all CIFs submitted for publication in IUCr journals (*Acta Crystallographica*, *Journal of Applied Crystallography*, *Journal of Synchrotron Radiation*); however, if you intend to submit to *Acta Crystallographica Section C* or *E* or *IUCrData*, you should make sure that full publication checks are run on the final version of your CIF prior to submission.

### **Publication of your CIF in other journals**

Please refer to the *Notes for Authors* of the relevant journal for any special instructions relating to CIF submission.

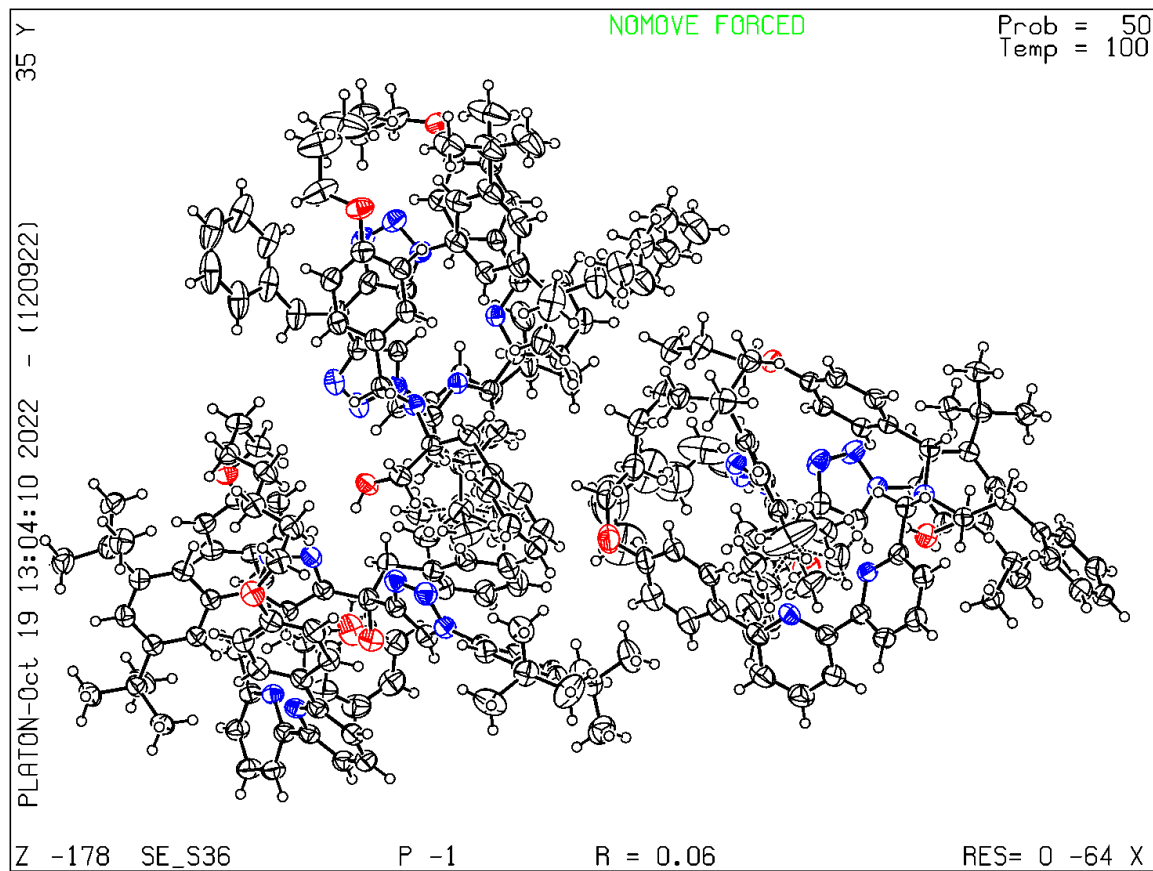

Supplement: Supplementary file 3 [file 80f5d3984a8ee7430710d3ee.pdf]
